# Supplementary material for: The Small RNA ErsA Impacts the Anaerobic Metabolism of Pseudomonas aeruginosa Through Post-Transcriptional Modulation of the Master Regulator Anr
Source: PubMed Central journal article supplement (PMC8575079; doi:10.3389/fmicb.2021.691608), 2021-08-20
Supplement: Image_2.pdf [file Image_2.pdf]

```

16  GUCCACCAGCAGU---UGCUGCAAAG  38  dnr mRNA
    :||  |||:|| |  ::||||| |
56  UAGACGGUUGUGAUUUGUGACGUUUC  31  ErsA

```

**Figure S2.** Model of base-pairing interaction between *ErsA* and *dnr* mRNA by IntaRNA software. The region from nt +31 to +56 of *ErsA* was predicted to bind within the coding sequence of *dnr* mRNA, from nt 16 to nt 38 downstream the translation start site (ATG). Sequence coordinates refer to the +1 translational start site for *dnr* mRNA.
