# Supplementary material for: The Small RNA ErsA Impacts the Anaerobic Metabolism of Pseudomonas aeruginosa Through Post-Transcriptional Modulation of the Master Regulator Anr
Source: PubMed Central journal article supplement (PMC8575079; doi:10.3389/fmicb.2021.691608), 2021-08-20
Supplement: Table_1.pdf [file Table_1.pdf]

**Table S1. Strains and plasmids**

| Strains or plasmids                            | Genotype or description                                                                                                                                                                                                                        | Construction                                    | Reference                                                               |
|------------------------------------------------|------------------------------------------------------------------------------------------------------------------------------------------------------------------------------------------------------------------------------------------------|-------------------------------------------------|-------------------------------------------------------------------------|
| <i>Pseudomonas aeruginosa</i>                  |                                                                                                                                                                                                                                                |                                                 |                                                                         |
| PAO1                                           | Wild-type                                                                                                                                                                                                                                      |                                                 | (Stover et al., 2000)                                                   |
| PAO1 <i>hfq</i> <sup>-</sup>                   | <i>hfq::aadA</i>                                                                                                                                                                                                                               |                                                 | (Sonnleitner et al., 2003)                                              |
| PAO1 $\Delta$ <i>ersA</i>                      | markerless $\Delta$ <i>ersA</i>                                                                                                                                                                                                                |                                                 | (Ferrara et al., 2015)                                                  |
| <i>P. aeruginosa</i> RP73                      | Wild-type                                                                                                                                                                                                                                      |                                                 | (Bianconi et al., 2015)                                                 |
| <i>P. aeruginosa</i> RP73 $\Delta$ <i>ersA</i> | markerless $\Delta$ <i>ersA</i>                                                                                                                                                                                                                |                                                 | (Ferrara et al., 2020)                                                  |
| <i>Escherichia coli</i>                        |                                                                                                                                                                                                                                                |                                                 |                                                                         |
| TOP10                                          | <i>mcrA</i> $\Delta$ ( <i>mrr</i> - <i>hsdRMS</i> - <i>mcrBC</i> )<br>$\phi$ 80 <i>lacZ</i> <i>ZDM15</i> $\Delta$ <i>lacX74</i> <i>deoR</i><br><i>recA1</i> <i>araD139</i> $\Delta$ ( <i>ara-leu</i> )7697<br><i>galU galK rpsL endA1 nupG</i> |                                                 | Invitrogen                                                              |
| Plasmids                                       |                                                                                                                                                                                                                                                |                                                 |                                                                         |
| pGM931                                         | pHERD20T derivative,<br><i>araC/P<sub>BAD</sub></i> - t $\Omega$ , Ap <sup>r</sup>                                                                                                                                                             |                                                 | (Qiu et al., 2008;<br>Delvillani et al., 2014;<br>Ferrara et al., 2015) |
| pGM- <i>ersA</i>                               | pGM931 derivative, <i>ersA</i> under<br><i>P<sub>BAD</sub></i> , Ap <sup>r</sup>                                                                                                                                                               |                                                 | (Ferrara et al., 2015)                                                  |
| pXG10-SF                                       | sfGFP reporter plasmid;<br><i>lacZ::gfp</i> under <i>P<sub>LtetO-1</sub></i> , Cm <sup>r</sup>                                                                                                                                                 |                                                 | (Corcoran et al., 2012)                                                 |
| pXG10- <i>anr::sfGFP</i>                       | pXG10-SF derivative;<br><i>P<sub>LtetO-1</sub></i> --> <i>anr::gfp</i> , Cm <sup>r</sup>                                                                                                                                                       | contains PCR<br>product using<br>oligos 2 and 3 | this work                                                               |
| pXG10- <i>dnr::sfGFP</i>                       | pXG10-SF derivative;<br><i>P<sub>LtetO-1</sub></i> --> <i>dnr::gfp</i> , Cm <sup>r</sup>                                                                                                                                                       | contains PCR<br>product using<br>oligos 4 and 5 | this work                                                               |
| pBBR1-MCS5                                     | <i>lacZ</i> $\alpha$ , Gm <sup>r</sup>                                                                                                                                                                                                         |                                                 | (Kovach et al., 1995)                                                   |
| pBBR1- <i>sfGFP</i>                            | pBBR1-MCS5 derivative;<br><i>P<sub>LtetO-1</sub></i> --> <i>gfp</i> , Gm <sup>r</sup>                                                                                                                                                          |                                                 | (Ferrara et al., 2015)                                                  |
| pBBR1- <i>anr::sfGFP</i>                       | pBBR1-MCS5 derivative;<br><i>P<sub>LtetO-1</sub></i> --> <i>anr::gfp</i> , Gm <sup>r</sup>                                                                                                                                                     | contains PCR<br>product using<br>oligos 6 and 7 | this work                                                               |
| pBBR1- <i>dnr::sfGFP</i>                       | pBBR1-MCS5 derivative;<br><i>P<sub>LtetO-1</sub></i> --> <i>dnr::gfp</i> , Gm <sup>r</sup>                                                                                                                                                     | contains PCR<br>product using<br>oligos 6 and 7 | this work                                                               |

## References

- Bianconi, I., Jeukens, J., Freschi, L., Alcalá-Franco, B., Facchini, M., Boyle, B., et al. (2015). Comparative genomics and biological characterization of sequential *Pseudomonas aeruginosa* isolates from persistent airways infection. *BMC Genomics* 16, 1105. doi: 10.1186/s12864-015-2276-8.
- Corcoran, C.P., Podkaminski, D., Papenfort, K., Urban, J.H., Hinton, J.C., and Vogel, J. (2012). Superfolder GFP reporters validate diverse new mRNA targets of the classic porin regulator, MicF RNA. *Mol Microbiol* 84(3), 428-445. doi: 10.1111/j.1365-2958.2012.08031.x.
- Delvillani, F., Sciandrone, B., Peano, C., Petiti, L., Berens, C., Georgi, C., et al. (2014). Tet-trap, a genetic approach to the identification of bacterial RNA thermometers: Application to *Pseudomonas aeruginosa*. *RNA* 20(12), 1963-1976. doi: 10.1261/rna.044354.114.
- Ferrara, S., Carloni, S., Fulco, R., Falcone, M., Macchi, R., and Bertoni, G. (2015). Post-transcriptional regulation of the virulence-associated enzyme AlgC by the  $\sigma$ <sub>22</sub>-dependent small RNA *ErsA* of *Pseudomonas aeruginosa*. *Environmental Microbiology* 17(1), 199-214. doi: 10.1111/1462-2920.12590.

- Ferrara, S., Rossi, A., Ranucci, S., De Fino, I., Bragonzi, A., Cigana, C., et al. (2020). The Small RNA ErsA Plays a Role in the Regulatory Network of *Pseudomonas aeruginosa* Pathogenicity in Airway Infections. *mSphere* 5(5). doi: 10.1128/mSphere.00909-20.
- Kovach, M.E., Elzer, P.H., Hill, D.S., Robertson, G.T., Farris, M.A., Roop, R.M., 2nd, et al. (1995). Four new derivatives of the broad-host-range cloning vector pBBR1MCS, carrying different antibiotic-resistance cassettes. *Gene* 166(1), 175-176.
- Qiu, D., Damron, F.H., Mima, T., Schweizer, H.P., and Yu, H.D. (2008). PBAD-based shuttle vectors for functional analysis of toxic and highly regulated genes in *Pseudomonas* and *Burkholderia* spp. and other bacteria. *Appl Environ Microbiol* 74(23), 7422-7426. doi: AEM.01369-08 [pii]
- 10.1128/AEM.01369-08.
- Sonnleitner, E., Hagens, S., Rosenau, F., Wilhelm, S., Habel, A., Jager, K.E., et al. (2003). Reduced virulence of a hfq mutant of *Pseudomonas aeruginosa* O1. *Microb Pathog* 35(5), 217-228. doi: 10.1016/s0882-4010(03)00149-9.
- Stover, C.K., Pham, X.Q., Erwin, A.L., Mizoguchi, S.D., Warrener, P., Hickey, M.J., et al. (2000). Complete genome sequence of *Pseudomonas aeruginosa* PAO1, an opportunistic pathogen. *Nature* 406(6799), 959-964. doi: 10.1038/35023079.
