# Supplementary material for: The Small RNA ErsA Impacts the Anaerobic Metabolism of Pseudomonas aeruginosa Through Post-Transcriptional Modulation of the Master Regulator Anr
Source: PubMed Central journal article supplement (PMC8575079; doi:10.3389/fmicb.2021.691608), 2021-08-20
Supplement: Table_2.pdf [file Table_2.pdf]

**Table S2. Oligonucleotides**

| Oligo # | Oligo Name           | Sequence (5' → 3') <sup>a</sup>                     | Utilization and Reference                                                                                                                                                                                                 |
|---------|----------------------|-----------------------------------------------------|---------------------------------------------------------------------------------------------------------------------------------------------------------------------------------------------------------------------------|
| 1       | 5'BIOTIN-SPA122      | [BIO]CCCGAGCTTCGTATGGGG                             | Biotinylated Northern-blot probe for ErsA (modified from (Ferrara et al., 2012))                                                                                                                                          |
| 2       | -31ATG_anr_Nsil_for  | GTTTTatgcatTGTTGTGCCTTTAACC<br>TAGCAAG              | Amplification of the 5' UTR and beginning of <i>anr</i> with <i>Nsil/NheI</i> ends for cloning in frame with <i>gfp</i> in pXG10-SF vector                                                                                |
| 3       | +66ATG_anr_NheI_rev  | GTTTTgctagcCGGGGCCAGACTGCA<br>ATC                   |                                                                                                                                                                                                                           |
| 4       | -116ATG_dnr_Nsil_for | GTTTTatgcatTCCGCTCGCCGGACC<br>GAC                   |                                                                                                                                                                                                                           |
| 5       | +96ATG_dnr_NheI_rev  | GTTTTgctagcGCTGCTGGCGAGCAG<br>TTC                   | Amplification of the 5' UTR and beginning of <i>dnr</i> with <i>Nsil/NheI</i> ends for cloning in frame with <i>gfp</i> in pXG10-SF vector                                                                                |
| 6       | Ptet-O1_ClaI_for     | GTTTTatgcatTCCCTATCAGTGATAG<br>AG                   | Amplification from the <i>P<sub>LtetO-1</sub></i> promoter to the stop codon of <i>gfp</i> of pXG10- <i>anr::gfp</i> / pXG10- <i>dnr::gfp</i> with <i>ClaI/XbaI</i> ends for cloning in pBBR1-MCS5 (Ferrara et al., 2015) |
| 7       | sfGFP_TAA_XbaI_rev   | TGATGCCctagaTTATTTGTAGAGCT<br>C                     |                                                                                                                                                                                                                           |
| 8       | sfGFP_+96_rev        | TTGTGCCCATTAACATCACCATC                             | Reverse primer on <i>gfp</i> for verification of constructs (Ferrara et al., 2015)                                                                                                                                        |
| 9       | T7_-31ATG_anr_for    | <b>CTAATACGACTCACTATAGGG</b> TGT<br>TGTGCCTTTAACCTA | Amplification of the 5' UTR and beginning of <i>anr</i> in fusion with RNA polymerase T7 promoter for <i>in vitro</i> transcription                                                                                       |
| 10      | +66ATG_anr_rev       | CGGGGCCAGACTGCAATC                                  |                                                                                                                                                                                                                           |
| 11      | T7_5'SPA0122_for     | <b>CTAATACGACTCACTATAGGG</b> CGA<br>ATGGCTTCTTGAGCC | Amplification of <i>ersA</i> in fusion with RNA polymerase T7 promoter for <i>in vitro</i> transcription (Ferrara et al., 2015)                                                                                           |
| 12      | 3'SPA0122_rev        | AAAAAAAACCCCGAGCTTCGTATGG<br>GGAG                   |                                                                                                                                                                                                                           |
| 13      | 16S_for              | TGTCGTCAGCTCGTGTCTGTA                               | Amplification of 16S for real time-PCR analysis (Vitale et al., 2008)                                                                                                                                                     |
| 14      | 16S_rev              | ATCCCCACCTTCCTCCGG T                                |                                                                                                                                                                                                                           |
| 15      | qAnr_for             | GCCCAGGCCCTGGAAAC                                   | Amplification of <i>anr</i> for real time-PCR analysis (Tribelli et al., 2019)                                                                                                                                            |
| 16      | qAnr_rev             | ATCATCTGCTGGTCATCGCG                                |                                                                                                                                                                                                                           |
| 17      | qDnr_For             | AGCCAGCTGTTCCGTTTCTC                                | Amplification of <i>dnr</i> for real time-PCR analysis (Jackson et al., 2013)                                                                                                                                             |
| 18      | qDnr_Rev             | GTGGCGTTCCTCAGGGAAAG                                |                                                                                                                                                                                                                           |

<sup>a</sup> [BIO]: Biotin. Lowercase: sites for restriction enzymes. Bold: T7 promoter sequence.

## References

- Ferrara, S., Brugnoli, M., de Bonis, A., Righetti, F., Delvillani, F., Dehò, G., et al. (2012). Comparative profiling of *Pseudomonas aeruginosa* strains reveals differential expression of novel unique and conserved small RNAs. *PLoS ONE* 7(5). doi: 10.1371/journal.pone.0036553.
- Ferrara, S., Carloni, S., Fulco, R., Falcone, M., Macchi, R., and Bertoni, G. (2015). Post-transcriptional regulation of the virulence-associated enzyme AlgC by the  $\sigma_{22}$ -dependent small RNA ErsA of *Pseudomonas aeruginosa*. *Environmental Microbiology* 17(1), 199-214. doi: 10.1111/1462-2920.12590.
- Jackson, A.A., Gross, M.J., Daniels, E.F., Hampton, T.H., Hammond, J.H., Vallet-Gely, I., et al. (2013). Anr and its activation by PlcH activity in *Pseudomonas aeruginosa* host colonization and virulence. *J Bacteriol* 195(13), 3093-3104. doi: 10.1128/JB.02169-12.

- Tribelli, P.M., Lujan, A.M., Pardo, A., Ibarra, J.G., Fernandez Do Porto, D., Smania, A., et al. (2019). Core regulon of the global anaerobic regulator Anr targets central metabolism functions in *Pseudomonas* species. *Sci Rep* 9(1), 9065. doi: 10.1038/s41598-019-45541-0.
- Vitale, E., Milani, A., Renzi, F., Galli, E., Rescalli, E., De Lorenzo, V., et al. (2008). Transcriptional wiring of the TOL plasmid regulatory network to its host involves the submission of the  $\sigma_{54}$ -promoter Pu to the response regulator PprA. *Molecular microbiology* 69(3), 698-713.
